# Supplementary material
Source: PubMed Central journal article supplement (PMC7980364)
Supplement: pnas.2020878118.sapp.pdf [file pnas.2020878118.sapp.pdf]

1

## 2 **Supplementary Information for**

### 3 **Evidence of a Liquid-Liquid Transition in a Glass-forming Ionic Liquid**

4 **Matthew A. Harris, Thomas Kinsey, Durgesh V. Wagle, Gary A. Baker, Joshua Sangoro**

5 **Joshua Sangoro.**  
6 **E-mail: [jsangoro@utk.edu](mailto:jsangoro@utk.edu)**

#### 7 **This PDF file includes:**

- 8     Supplementary text
- 9     Figs. S1 to S6
- 10    Table S1
- 11    SI References

## 12 Supporting Information Text

### 13 Materials and Methods

#### 14 Synthesis of $[P_{666,14}]^+[BH_4]^-$

15 The ionic liquid used in this study was synthesized from  $[P_{666,14}]^+[Cl]^-$  by metathesis methods.(1–5) Sodium borohydride  
16 (213462, 99%), chloroform (CX1059-1), and sodium hydroxide (795429,  $\geq 97\%$ ) were acquired from MilliporeSigma (St. Louis,  
17 MO). The salt  $[P_{666,14}]^+[Cl]^-$  ( $>93\%$ , CYPHOS<sup>®</sup> IL 101; CAS No. 258864-54-9) was a product of Cytec Canada Inc. (Cytec  
18 is currently owned by Solvay, Houston, TX).

19 To initiate ionic liquid synthesis, 10.0g (19.3mmol) of  $[P_{666,14}]^+[Cl]^-$  was introduced to a 250mL round bottom flask already  
20 containing 100mL of chloroform, followed by stirring for 30 minutes. To this reaction mixture, 1.0 equivalent of the sodium salt  
21 ( $NaBH_4$ ) was added, followed by the addition of 100mL of Millipore water (18.2M $\Omega$ cm). The reaction mixture was stirred for 2  
22 hours, then allowed to stand for an additional 30 minutes for chloroform-water phase separation. Centrifugation was performed  
23 to encourage phase disentanglement. The dense chloroform layer was washed with Millipore water five times to remove traces  
24 of NaCl by-product residing within the organic layer. Following aqueous washes, the chloroform layer was taken and dried over  
25 anhydrous  $MgSO_4$ . The chloroform layer was filtered through sintered glass to remove the drying agent and the chloroform was  
26 removed on a rotary evaporator to isolate the ionic liquid as a free-flowing liquid.

27  $^1H$  NMR (500MHz,  $CDCl_3$ ) spectra of  $[P_{666,14}]^+[BH_4]^-$ , assigned as follows, validate a successful synthesis.

28  
29  $[P_{666,14}]^+[BH_4]^-$ :  $\delta$  2.363 (m, 8H), 1.718 (s, 2H), 1.520 (m, 16 H), 1.325 (m, 14 H), 1.267 (m, 16H), 0.909 (t, 12H),  
30 0.268 (s, 1H), 0.105 (s, 1H), -0.058 (s, 1H), -0.222 (s, 1H)

#### 32 Wide-angle X-ray Scattering

33 The wide-angle X-ray scattering (WAXS) measurements were performed on the Xenocs Xeuss 3.0 SAXS instrument at the  
34 Joint Institute for Advanced Materials. The sample was first dried under vacuum ( $< 10^{-6}$  bar) at 340K for 24 hours and then  
35 loaded into a fused silica capillary tube with 1.5mm outside diameter and 0.01mm wall thickness. The capillary tube was sealed  
36 with a clear epoxy prior the measurement. The temperature of the sample was controlled with a Linkam HFSX350 stage to  
37 within  $\pm 0.1K$  using liquid nitrogen as a coolant. The scattering intensity was measured under vacuum in the q-range from 0.13  
38 to 3.9  $\text{\AA}^{-1}$ . The sample was initially measured at room temperature and then cooled to 195K (below  $T_g$ ) at 10K/min. The  
39 sample was held at each temperature for 60s before collecting data over a 120s integration time. Measurements were taken at a  
40 series of temperatures upon heating the sample from below  $T_g$  back to room temperature.

#### 42 Raman Spectroscopy

43 Raman measurements were performed using the Horiba LabRAM HR Evolution confocal Raman microscope with a 532nm  
44 excitation laser at 50% power, a 50x LWD objective, over three 15s accumulations, and 1800 gratings per mm filter to achieve  
45  $0.5\text{cm}^{-1}$  resolution. The sample was first dried under vacuum ( $< 10^{-6}$  bar) at 340K for 24 hours. A drop of the sample was  
46 then loaded into a Linkam THMS600 temperature stage with silica windows to control the temperature to within  $\pm 0.1K$  using  
47 liquid nitrogen as the coolant, and the sample thickness was maintained at approximately  $150\mu\text{m}$  using Teflon spacers. The  
48 sample was measured in the temperature range from 183K to 253K on cooling at 5K/min and heating at 10K/min pausing at  
49 each temperature for the duration of the measurement. Variations between the cooling and heating data were minimal.

#### 51 Broadband Dielectric Spectroscopy

52 Broadband dielectric spectroscopy (BDS) measurements were performed in the frequency range of  $10^{-1}$ - $10^7\text{Hz}$  using a Novo-  
53 control High Resolution Dielectric Alpha Analyzer with a Quatro liquid nitrogen temperature control system with  $\pm 0.1K$   
54 temperature stability. The BDS measurements were carried out using gold-plated brass electrodes, 20mm in diameter, with  
55 Teflon spacers approximately  $150\mu\text{m}$  in thickness. The sample was dried under vacuum ( $< 10^{-6}$  bar) at 340K for 24 hours prior  
56 to being loaded between the electrodes using a syringe and inserted into the cryostat. Prior to measurement, the samples were  
57 annealed at 340K for more than 2 hours to ensure the spectra were not changing with time. Dielectric spectra were collected  
58 in 5K intervals on cooling from 340K to 150K and then on heating back to 340K in 10K intervals. This temperature sweep  
59 was repeated to ensure thermal reproducibility. For each temperature point, the sample took approximately 10 minutes for  
60 the temperature to stabilize and 5 minutes to measure the full frequency range. For temporal dielectric measurements the  
61 sample was prepared as described above. The sample was initially heated to 340K to equilibrate the high-temperature liquid  
62 structure. The sample was then rapidly cooled at about 10K/min to 210K in between  $T_g$  and  $T_{LL}$ . Once the temperature  
63 stabilized measurements were performed from  $10^{-1}$ - $10^7\text{Hz}$  every 360s up to 1hr.

#### 65 Differential Scanning Calorimetry

66 Differential scanning calorimetry (DSC) measurements were conducted using a TA Instruments Q2000 DSC instrument. The  
67 sample was weighed into an aluminum pan of predetermined weight using a Mettler Toledo microbalance with an accuracy of

68 0.1 $\mu$ g and hermetically sealed before being loaded into the DCS instrument. An empty aluminum pan of the same type was  
 69 used as a reference. The sample was initially heated to 340K to erase its thermal history. The DSC data was measured at a  
 70 temperature ramp rate of 10K/min from 340K down to 150K and back up to 340K. This temperature sweep was cycled 3 times  
 71 to ensure thermal reproducibility of the data.

## 72 Supplementary Text

### 73 Analysis of WAXS data

74 The WAXS data was processed in an iterative fashion by first fitting the raw intensity ( $I(q)$ ) data at 300K (Fig. S1) using two  
 75 Teubner-Strey functions(6), given by Eqn. S1, to describe the  $q < 1\text{\AA}^{-1}$  range combined with three Lorentzian functions (Eqn.  
 76 S2) to account for the  $q > 1\text{\AA}^{-1}$  range.

$$77 S_{TS}(q) = 4\pi \frac{\Delta^2 \cos\varphi - (q^2 - q_0^2) \sin\varphi}{\Delta^4 + (q^2 - q_0^2)^2} \quad [1]$$

$$78 S_L(q) = I_0 \frac{\gamma^2}{\gamma^2 + (q - q_0)^2} \quad [2]$$

80 The data from the fit was then normalized to give intensity values of order unity. After that, the pair-distribution function  
 81 (PDF),  $g(r)$ , was calculated from the normalized fit data according to Eqn. S3.(7)

$$82 g(r) = 1 + \frac{1}{2\pi^2 r \rho_0} \int_0^\infty q[S(q) - 1] \sin(qr) dq \quad [3]$$

83 The normalization of the  $I(q)$  was then adjusted so that the limit of  $g(r)$  as  $r \rightarrow \infty$  approaches a value of 1. Once this criteria  
 84 was achieved for the  $I(q)$  at 300K, yielding a normalization factor of 163, the same factor was applied to the  $I(q)$  for the other  
 85 temperatures to obtain the structure factor,  $S(q)$ . Density values necessary for the calculation of  $g(r)$  were assumed to be  
 86 linear as a function of temperature and were estimated based on correlations found in the literature.(8)

87 The  $S(q)$  data at each temperature were fit using the same set of functions described above and the fit data were used to  
 88 calculate  $g(r)$ . From the fitting parameters in the Teubner-Strey function the periodicity,  $d$ , and the correlation length,  $\xi$ , can  
 89 be extracted from the relations in Eqn. S4 and S5.(6)

$$90 \Delta^2 = \frac{4\pi}{\xi d} \quad [4]$$

$$91 q_0^2 = \left(\frac{2\pi}{d}\right)^2 - \frac{1}{\xi^2} \quad [5]$$

92  
 93 These relations were used to determine  $d$  and  $\xi$  of the polarity alternation structure (Fig. 1C and 1D in the main text) and the  
 94 charge alternation structure (Fig. S2A and S2B). Note that the periodicity of the charge alternation structure ( $d_{ch}$ , Fig. S2A)  
 95 is independent of temperature while the correlation length ( $\xi_{ch}$ , Fig. S2B) shows a discontinuity at  $T_{LL}$ . This indicates that the  
 96 interionic distances, reflected by  $d_{ch}$ , are governed primarily by Coulombic interactions and steric effects while  $\xi_{ch}$  is sensitive  
 97 to the morphology of the liquid. The increase in  $\xi_{ch}$  below  $T_{LL}$  reflects the change from a single-stranded morphology to a  
 98 double-stranded one. The peak positions from the Lorentzian fits,  $q_0$ , can be converted to real-space lengths using  $d = 2\pi/q_0$ .  
 99 This is specifically pertinent to analyzing the temperature dependence of the charge adjacency peak around  $1.8\text{\AA}^{-1}$  shown in  
 100 Fig. S2C. The length scale of the charge adjacency correlation are taken as a proxy of density correlations since this correlation  
 101 reflects the average distance from a reference ion to its nearest neighbor counterion. The length scale,  $d_{adj}$ , contracts almost  
 102 monotonically as the temperature of the  $[\text{P}_{666,14}]^+[\text{BH}_4]^-$  IL is decreased from 300K to  $T_g \approx 198\text{K}$ . Similarly, the inverse cube of  
 103  $d_{adj}$  increases almost monotonically across the same temperature range (Fig. S2D) indicating an increase in the overall density  
 104 of the IL. A slight kink in these quantities is observed around the  $T_{LL}$  reflecting a slight decrease in density at the LLT. These  
 105 effects are small but they may indicate that the density of the system is affected by the structural reorganization accompanying  
 106 the liquid-liquid transition. This is unexpected since the density correlation is largely governed by the competition between  
 107 steric effects due to the long cationic alkyl chains and electrostatic attraction between the cation and anion, both of which are  
 108 not significantly altered by the specific morphology of the liquid, but primarily influenced by the energetics of the system.

109 An important quantity in understanding the structural reorganization at the LLT is the average coordination number,  $n_{av}$   
 110 (Fig. 1E in the main text). This can be calculated from  $g(r)$  using Eqn. S6.(7)

$$111 n_{av} = 4\pi\rho_0 \int_{r_1}^{r_2} g(r)r^2 dr \quad [6]$$

112 By taking  $r_1$  and  $r_2$  as the first and second minima in  $g(r)$ , this equation can be used to calculate the coordination number of  
 113 the IL in the first shell corresponding to nearest neighbor ions. The quantity of  $n_{av}$  can be regarded as a proxy for the bond  
 114 order parameter from the two-order parameter model of Tanaka.(9) Changes to this parameter within the temperature range  
 115 from the high temperature liquid down to the glass transition temperature are indications of an increase in the number of  
 116 locally-favored structures leading to the first order liquid-liquid transition observed in  $[\text{P}_{666,14}]^+[\text{BH}_4]^-$ .

117

## Analysis of Raman spectra

Particular regimes of the Raman spectra identified as reflective of the configuration of alkyl chains(10) were fit using a series of Gaussian peaks in order to quantify peak positions, intensities, and widths. Regions of interest included the  $\nu(C - C)$  region between 1065 and 1130 $\text{cm}^{-1}$ , the  $\tau(CH_2)$  region around 1300 $\text{cm}^{-1}$ , the  $\delta(CH_2)$  and  $\delta_a(CH_3)$  region between 1440 and 1458 $\text{cm}^{-1}$ , and the  $\nu(CH_{2/3})$  region between 2800 and 3000 $\text{cm}^{-1}$ . The  $\nu(C - C)$  region was normalized to the height of the peak at 1050 $\text{cm}^{-1}$  prior to peak fitting. Peak fitting of the  $\delta(CH_{2/3})$  region was performed without prior normalization. The regions of the Raman spectra around 1300 $\text{cm}^{-1}$  and 1440-1458 $\text{cm}^{-1}$  along with the ratio of the integrated areas of the  $\delta_a(CH_3)$  to  $\delta(CH_2)$  peaks are given in Fig. S3. Note in Fig. S3C, the ratio  $A(\delta_a(CH_3))/A\delta(CH_2)$  decreases monotonically with temperature down to the glass transition reflecting the slowing of local motions in the alkyl chains. The  $\nu(CH_{2/3})$  region was normalized based on the integrated area between 2800 and 3000 $\text{cm}^{-1}$ .

## Analysis of Dielectric Spectra

The dielectric spectra of the  $[P_{666,14}]^+[\text{BH}_4]^-$  ionic liquid obtained at various temperatures was shown in Figure 3 in the main text. The frequency dependent dielectric data are well-described by a linear combination of empirical Havriliak-Negami (HN) functions with the random barrier model (RBM) to account for ion transport and a power law function of the radial frequency,  $\omega$ , to account for electrode polarization effects in the low-frequency portion of the spectra, given by Equation S7.(11)

$$\varepsilon^*(\omega) = \sum_{i=1}^n \left[ \frac{\Delta\varepsilon_i}{[1 + (i\omega\tau_i)^{\beta_i}]^{\gamma_i}} \right] + \frac{\sigma_0}{\varepsilon_0} \left[ \frac{\tau_e}{\ln(1 + i\omega\tau_e)} \right] + A\omega^{-\lambda} + \varepsilon_\infty \quad [7]$$

The solid black lines in Figure 3 (main text) represent fits using Equation S7, where  $\Delta\varepsilon_i$  is the dielectric relaxation strength,  $\tau_i$  is the relaxation time,  $\beta_i$  is the symmetric stretching parameter, and  $\gamma_i$  is the asymmetric stretching parameter for the HN functions in the first term. The second term represents the RBM where  $\sigma_0$  is the DC conductivity,  $\tau_e$  is the characteristic ion diffusion time, and  $\varepsilon_0$  is the vacuum permittivity. The third term accounts for the parasitic effects of electrode polarization which can obscure dipolar relaxations in the sub- $\alpha$  region of the dielectric spectra due to accumulation of ions at the electrode surface. A fractal power law is used to correct for the low-frequency electrode polarization contribution where  $A$  is the pre-exponential factor and  $\lambda$  describes the fractal nature of the phenomenon.(11–13) The final parameter,  $\varepsilon_\infty$  is the limiting high-frequency permittivity. The empirical HN function accounts for non-ideal dipolar relaxations with a distribution of relaxation times associated with reorientation of dipoles in the alternating electric field while the RBM accounts for charge transport in which charge carriers diffuse in a random, spatially heterogeneous potential energy landscape(11, 14–17). For charge transport to occur, the ions must hop over the randomly distributed energy barriers. The analytical expression of the RBM is obtained from the continuous-time-random-walk approximation assuming a non-interacting charge carrier isolated in a random energy landscape.(18–21) The RBM combined with the appropriate number of HN functions and the power law accounting for the low-frequency dispersion due to electrode polarization quantitatively describes the data as shown in Figure 3 (main text). The number of HN functions required to describe the data varied with the temperature of the sample. In general, the structural dynamics of the ionic liquid are described by an HN function denoted with the subscript  $\alpha$  for the primary relaxation. The structural dynamics of the ionic liquid are coupled to the ion motion since this is a pure aprotic ionic material such that  $\omega_\alpha \approx \omega_e$ , where  $\omega_i = 1/\tau_i$  is the relaxation rate (21). The coupling of the ion motion to the structural  $\alpha$  relaxation indicates that ion hops are accompanied by local reorientation of surrounding ions(14). The  $[P_{666,14}]^+[\text{BH}_4]^-$  ionic liquid also shows a secondary relaxation observed at high frequencies and low temperatures denoted as a beta process by the subscript  $\beta$ , which has been associated with librations of the alkyl chains on the cation(17) and will not be discussed further. An additional HN function is necessary to fit the emergent slow, sub- $\alpha$  process that appears in the spectra of  $[P_{666,14}]^+[\text{BH}_4]^-$  at and below 220K.

The derivative representation of the imaginary part of the complex dielectric function, defined as  $\varepsilon''_{der} = (-\pi/2) [\partial\varepsilon'/\partial \ln(\omega)]$  based on the Kramers-Kronig relation(11), plotted versus radial frequency,  $\omega$ , at various temperatures in Figure 3C in the main text reveals the relaxation behavior without the strong contribution from DC ionic conductivity. This representation allows for the observation of slow dynamics at frequencies below the characteristic ion diffusion rate. In this representation, the primary alpha relaxation is observed as a symmetric peak with a peak maximum at  $\omega_\alpha \approx \omega_e$ . It is clear that a slower, sub- $\alpha$  relaxation peak emerges at lower temperatures approaching the glass transition temperature for  $[P_{666,14}]^+[\text{BH}_4]^-$ . Observations of an emergent sub- $\alpha$  relaxation in super-cooled IL systems have not been previously reported in the literature suggesting a new type of behavior in ILs. This emergent sub- $\alpha$  process may be associated with the formation of polarizable interfaces between the ion-rich domain and the alkyl-rich domain on the nanoscale as the dynamics of the system slow down near the glass transition temperature. A slow dielectric relaxation in other IL systems has been previously reported and attributed to interfacial polarization occurring at the boundary between polar and nonpolar regions of the liquid.(22–25) The assignment of the sub- $\alpha$  relaxation to polarization of the interface separating ion-rich and alkyl-rich domains has been corroborated by scattering and simulation studies showing aggregation of anions and cation headgroups into a polar region excluding the alkyl chains into spatially distinct nonpolar domains.(25–39) However the slow dielectric relaxation is not always observed in nanostructured ILs due to variations in the morphology and connectivity of the polar domain with cation structure and alkyl

174 chain length.(24, 40) The emergence of this interfacial polarization for these systems may indicate a structural change in the  
 175 local environment as the ion motion slows upon cooling.

176 The procedure used to fit the dielectric data was as follows. First, the  $\sigma_0$  values were picked based on the plateau in  $\sigma'$  and  
 177 subsequently fixed in fitting attempts. The data was then fit across the entire frequency window in the  $\varepsilon'$  representation using  
 178 the real part of Equation S7 initialized with reasonable estimates of the parameters based on visual inspection. Once satisfactory  
 179 fits were obtained, the fit lines were converted to the derivative representation and compared to the derivative spectra computed  
 180 from the data itself. The fits were deemed accurate if they described well both the  $\varepsilon'$  and the  $\varepsilon''_{der}$  representations. The static  
 181 dielectric permittivity was calculated from the fitting results using  $\varepsilon_s = \Delta\varepsilon_{sub-\alpha} + \Delta\varepsilon_\alpha + \Delta\varepsilon_\beta + \frac{\sigma_0\tau_e}{\varepsilon_0} + \varepsilon_\infty$ , and contains  
 182 contributions from electronic, orientation, ionic, and interfacial polarization.(41)  
 183

### 184 Analysis of DSC data

185 The heat capacity data,  $C_p$ , shown in Figure 4C in the main text reveal an asymmetric, calorimetric peak in the  $[P_{666,14}]^+ [BH_4]^-$   
 186 IL sample. This asymmetric peaks in heat capacity indicates that this ionic liquid undergoes a thermodynamic transition  
 187 above the glass transition temperature.

188 The calorimetric peaks observed for  $[P_{666,14}]^+ [BH_4]^-$  suggest a first-order liquid-liquid transition similar to those reported for  
 189 other glass-forming systems.(42–45) Analysis of the configurational entropy, which can be calculated from the heat capacity, can  
 190 shed light on the thermodynamic behavior of these systems approaching the glass transition temperature from the supercooled  
 191 liquid state by invoking the theory of Adam and Gibbs (AG) based on cooperatively rearranging regions which establishes a  
 192 link between the temperature dependence of the configurational entropy,  $S_c$ , and the dynamics of the structural relaxation.(46–  
 193 49) In Figure 4D, the calculated configurational entropy,  $S_c$ , was plotted versus temperature. The temperature-dependent  
 194 configurational entropy was calculated from the heat capacity data using the formula given in Equation S8.(47)

$$195 \quad S_c(T) = \Delta S_{fus} - \int_T^{T_{fus}} C_p^{melt}(T') - C_p^{cryst}(T') d \log T' \quad [8]$$

196 In this equation,  $S_c$  is the configurational entropy,  $T_{fus}$  is the temperature of fusion,  $\Delta S_{fus} = \Delta H_{fus}/T_{fus}$  is the entropy of  
 197 fusion, and  $T'$  is the integration variable associated with the  $C_p(T)$  data. Since these systems do not readily crystallize, the  
 198 heat capacity of the crystal state,  $C_p^{cryst}$ , was approximated using the limiting low-temperature heat capacity of the glassy  
 199 state. The contribution from the entropy of fusion was accounted for by assuming the validity of a Vogel-Fulcher-Tammann  
 200 (VFT) Adam-Gibbs (AG) form of the temperature dependence of the configurational entropy given by Equation S9.(47)

$$201 \quad S_c(T) = S_\infty \left( 1 - \frac{T_K}{T} \right) \quad [9]$$

202 Here  $S_\infty$  is the limiting value of  $S_c(T \rightarrow \infty)$  and  $T_K$  is the Kauzmann temperature where  $S_c(T)$  becomes zero. The definition of  
 203 the VFT-AG form of the temperature dependence of  $S_c(T)$  imposes the constraint  $T_K = T_0$ , where  $T_0$  is the Vogel temperature  
 204 from the VFT form of the temperature dependence of the relaxation rates given by Equations S10 and S11.(11, 47, 50)

$$205 \quad \omega(T) = \frac{1}{\tau(T)} = \omega_\infty \exp \left[ \frac{-DT_0}{T - T_0} \right] \quad [10]$$

$$206 \quad \log_{10}(\omega) = \log_{10} \omega_\infty + \frac{-DT_0 \log_{10} e}{T - T_0} \quad [11]$$

208 Here  $\omega_\infty$ ,  $D$ , and  $T_0$  are constant parameters with respect to temperature. The Vogel temperature,  $T_0$ , was obtained from  
 209 fits of the DC conductivity,  $\sigma_0$ , as a function of inverse temperature using Equation S11 along with the fact that  $\sigma_0 \propto \omega_\alpha$   
 210 to describe the temperature dependence of the DC conductivity shown in Figure 4A in the main text. Parameters obtained  
 211 from the VFT fits are given in Table S1 along with parameters from the VFT-AG fits to the  $S_c(T)$  data. After numerical  
 212 integration of the heat capacity data, the Vogel temperatures along with Equation S9 were utilized to adjust the magnitude of  
 213 the configurational entropies so that  $T_K \approx T_0$ .

214 Although the high temperature configurational entropy data are well-described by the VFT-AG equation, shown as a dotted  
 215 line in the plot in Figure 4D in the main text, the data deviate from VFT-AG behavior near the glass transition temperature.  
 216 The configurational entropy falls off to a limiting low temperature value at higher temperatures than predicted by the VFT-AG  
 217 form of the temperature dependence. Since configurational entropy accounts for all but the vibrational contributions to the  
 218 entropy of the melt, this indicates that this IL undergoes a structural rearrangement that eliminates some of the accessible  
 219 microstates of the melt approaching  $T_g$ (49).  
 220

### 221 Error Analysis

222 Error bars displayed in the graphs were obtained from the standard deviations of the fitting parameters.  
 223

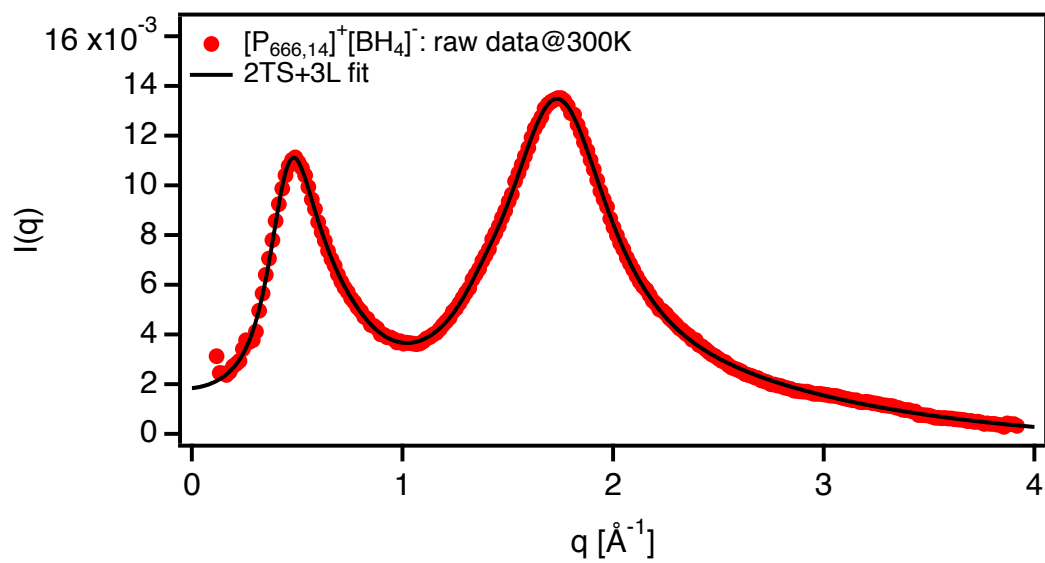

Fig. S1. Raw  $I(q)$  data for  $[\text{P}_{666,14}]^+[\text{BH}_4]^-$  at 300K.

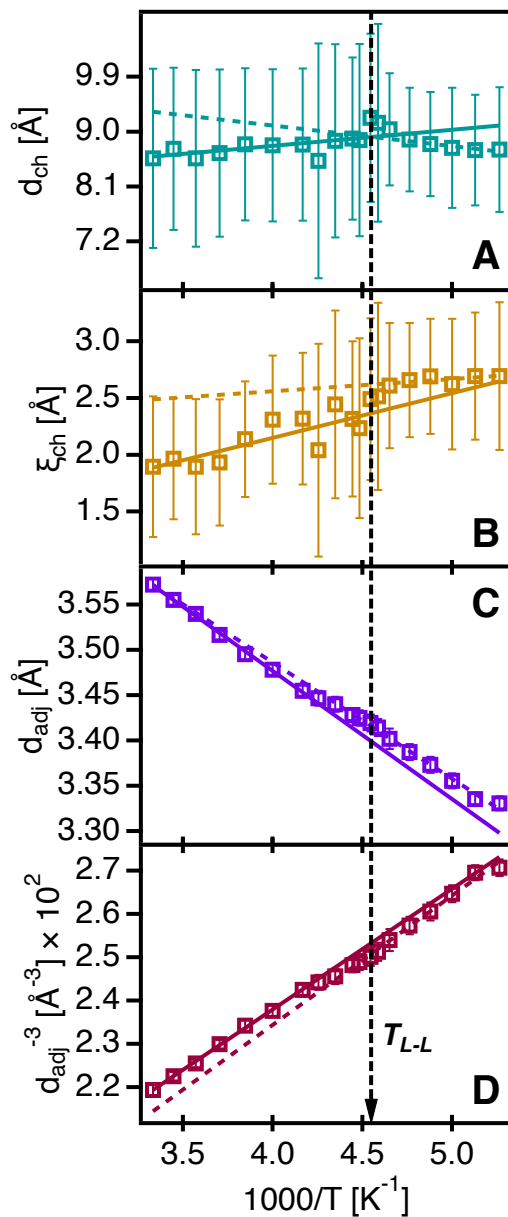

**Fig. S2. Length scales of the charge alternation structure and the charge adjacency structure.** **A** Charge alternation periodicity,  $d_{ch}$ , versus inverse temperature. **B** Charge alternation correlation length,  $\xi_{ch}$ . **C** Charge adjacency length,  $d_{adj}$ . **D** Inverse cube of  $d_{adj}$  serves as a proxy for density correlations. Solid and dotted lines represent fits to the data to serve as guides for the eye.

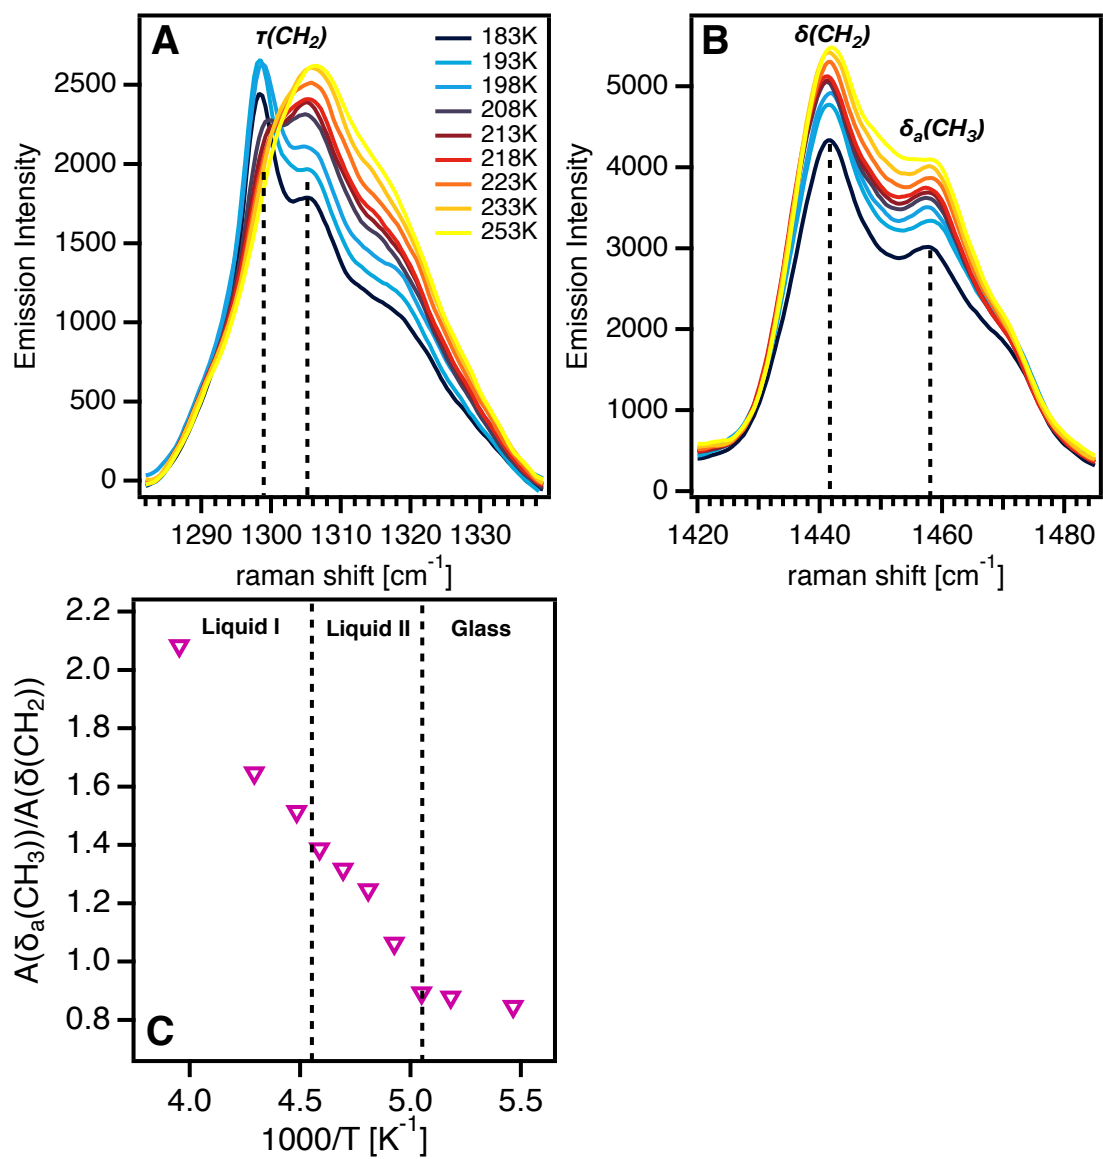

**Fig. S3. Detail of Raman spectra.** **A** Raman spectra of  $[P_{666,14}]^+ [BH_4]^-$  between  $1280$  and  $1340 cm^{-1}$  showing the  $\tau(CH_2)$  modes. **B** Raman spectra of  $[P_{666,14}]^+ [BH_4]^-$  between  $1420$  and  $1485 cm^{-1}$  showing the  $\delta(CH_2)$  modes. **C** Ratio of the integrated areas of the  $\delta_a(CH_3)$  and  $\delta(CH_2)$  modes.



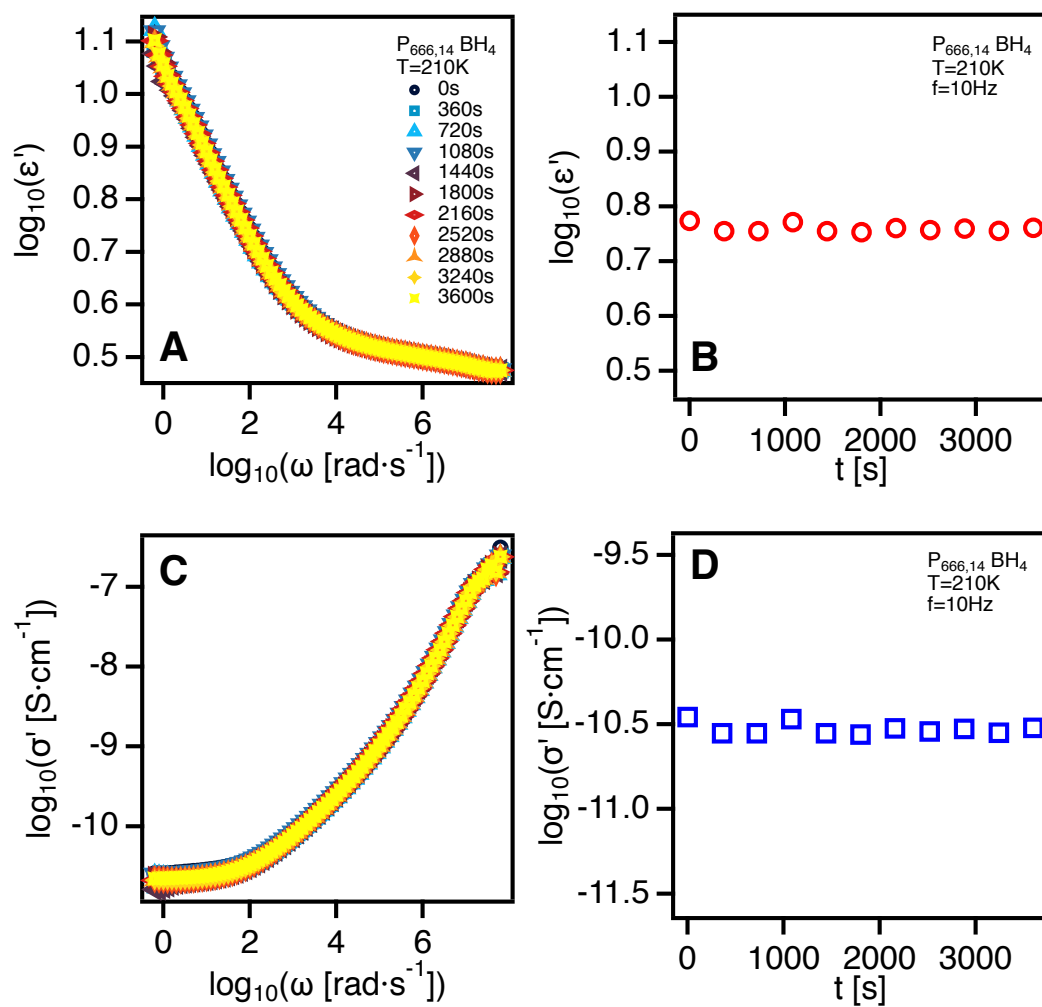

**Fig. S4. Temporal evolution of dielectric spectra of  $[P_{666,14}]^+ [BH_4]^-$  at 210K measured over 1 hour. A** Real part of the complex dielectric function,  $\epsilon'$  versus radial frequency,  $\omega$ . **B** Real part of the complex dielectric function,  $\epsilon'$  versus time,  $t$ , at 10Hz. **C** Real part of the complex conductivity function,  $\sigma'$  versus radial frequency,  $\omega$ . **D** Real part of the complex conductivity function,  $\sigma'$  versus time,  $t$ , at 10Hz.

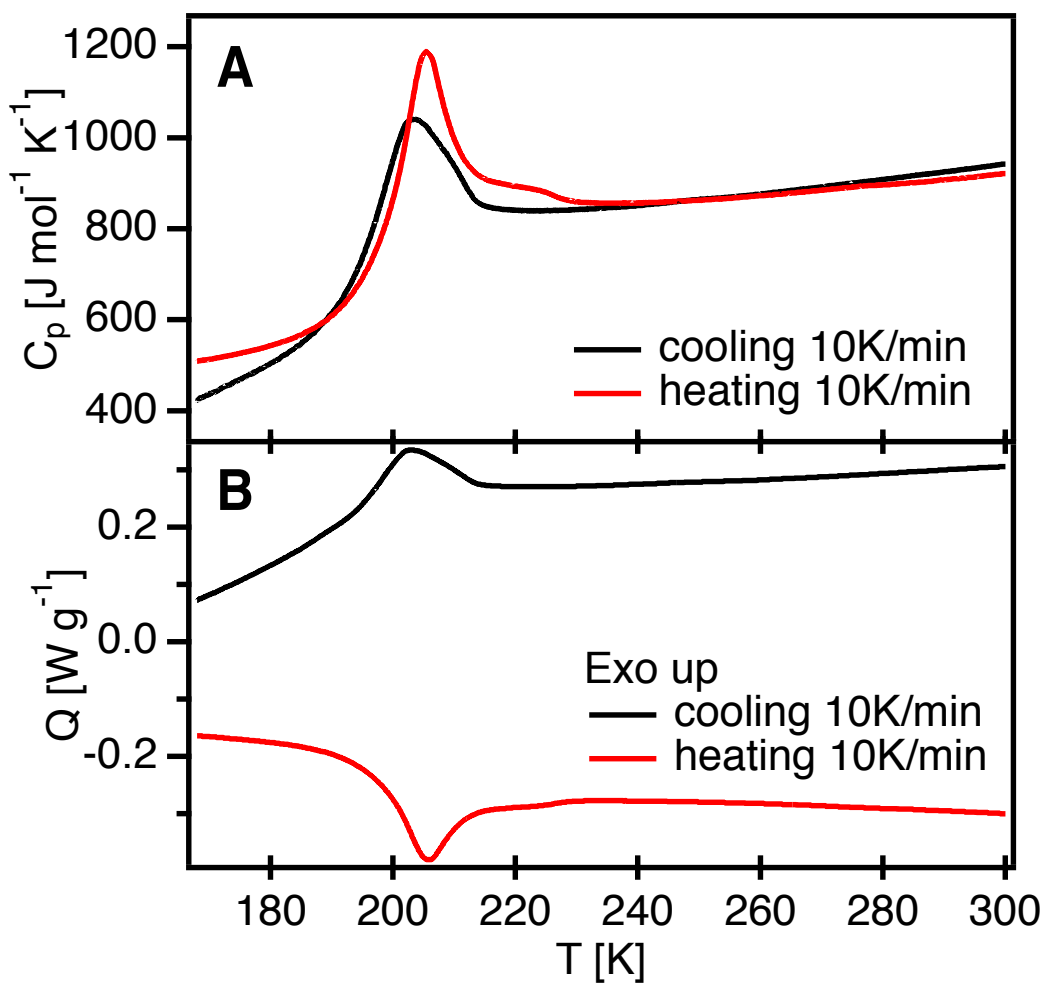

**Fig. S5. Reversibility of DSC results.** (A) Heat capacity of  $[\text{P}_{666,14}]^+[\text{BH}_4]^-$  between 170K and 300K on cooling at 10K/min (black) and heating at 10K/min (red). (B) Heat flow of  $[\text{P}_{666,14}]^+[\text{BH}_4]^-$  between 170K and 300K on cooling at 10K/min (black) and heating at 10K/min (red).

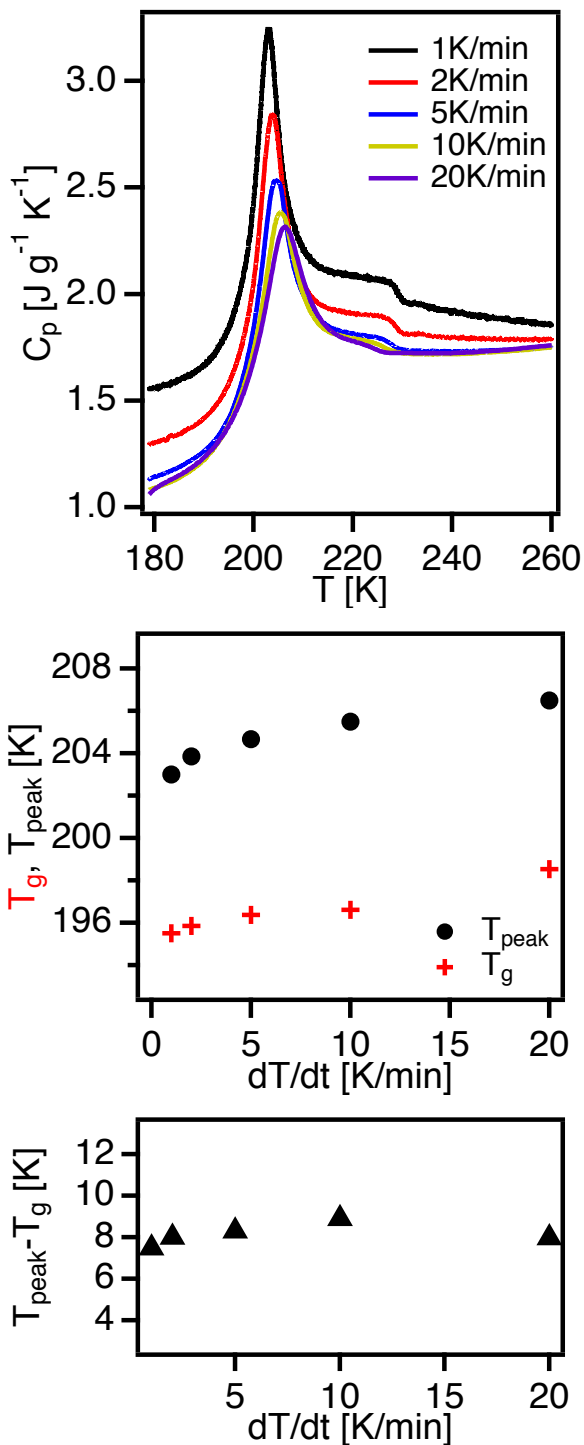

**Fig. S6. Heating rate dependence of DSC results.** **A** Heat capacity of  $[P_{666,14}]^+ [BH_4]^-$  between 180K and 260K at various heating rates. **B** Heating rate dependence of  $T_g$  and the temperature at the peak maximum,  $T_{peak}$ . **C** Heating rate dependence of the separation of  $T_{peak}$  and  $T_g$ .

**Table S1. Parameters from VFT fits to  $\sigma_0(T)$  and VFT-AG fits to  $S_c(T)$  including glass transition temperatures,  $T_g$ , and fragilities,  $m$ .**

|           | $\log \sigma_\infty$ | $D$            | $T_0/K$         | $S_\infty/JK^{-1}mol^{-1}$ | $T_k/K$         | $T_g/K$ | $m$   |
|-----------|----------------------|----------------|-----------------|----------------------------|-----------------|---------|-------|
| Liquid I  | $0.34 \pm 0.01$      | $14.5 \pm 0.1$ | $128.1 \pm 0.5$ | $329.9 \pm 0.1$            | $128.1 \pm 0.1$ | 184.3   | 46.9  |
| Liquid II | $-4.0 \pm 1.0$       | $2.9 \pm 1.1$  | $176.8 \pm 6.4$ | $661.0 \pm 1.5$            | $173.4 \pm 0.1$ | 198.0   | 100.0 |

- 225 1. CJ Bradaric, A Downard, C Kennedy, AJ Robertson, Y Zhou, Industrial preparation of phosphonium ionic liquids. *Green*  
226 *Chem.* **5**, 143–152 (2003).
- 227 2. KJ Fraser, DR MacFarlane, Phosphonium-based ionic liquids: An overview. *Aust. J. Chem.* **62**, 309–321 (2009).
- 228 3. N Bhawawet, JB Essner, DV Wagle, GA Baker, Ionic liquid anion controlled nanoscale gold morphology grown at a liquid  
229 interface. *Langmuir* **33**, 6029–6037 (2017) PMID: 28535055.
- 230 4. H Jin, et al., Physical properties of ionic liquids consisting of the 1-butyl-3-methylimidazolium cation with various anions  
231 and the bis(trifluoromethylsulfonyl)imide anion with various cations. *The J. Phys. Chem. B* **112**, 81–92 (2008) PMID:  
232 18069817.
- 233 5. DV Wagle, AJ Rondinone, JD Woodward, GA Baker, Polyol Synthesis of Magnetite Nanocrystals in a Thermostable Ionic  
234 Liquid. *Cryst. Growth Des.* **17**, 1558–1567 (2017).
- 235 6. H Weiss, et al., Mesoscopic correlation functions in heterogeneous ionic liquids. *J. Phys. Chem. B* **121**, 620–629 (2017).
- 236 7. MI Ojovan, DV Louzguine-Luzgin, Revealing Structural Changes at Glass Transition via Radial Distribution Functions. *J.*  
237 *Phys. Chem. B* **124**, 3186–3194 (2020).
- 238 8. Y Marcus, Ionic and molar volumes of room temperature ionic liquids. *J. Mol. Liq.* **209**, 289–293 (2015).
- 239 9. H Tanaka, Bond orientational order in liquids: Towards a unified description of water-like anomalies, liquid-liquid transition,  
240 glass transition, and crystallization; Bond orientational order in liquids. *Eur. Phys. J. E* **35** (2012).
- 241 10. CJ Orendorff, MW Ducey, JE Pemberton, Quantitative correlation of Raman spectral indicators in determining conforma-  
242 tional order in alkyl chains. *J. Phys. Chem. A* **106**, 6991–6998 (2002).
- 243 11. F Kremer, A Schönhals, eds., *Broadband Dielectric Spectroscopy*. (Springer, New York), (2003).
- 244 12. SH Liu, Fractal model for the ac response of a rough interface. *Phys. Rev. Lett.* **55**, 529–532 (1985).
- 245 13. HP Schwan, B Onaral, Linear and nonlinear properties of platinum electrode polarisation iii: Equivalence of frequency-and  
246 time-domain behaviour. *Med. Biol. Eng. Comput.* **23**, 28–32 (1985).
- 247 14. JR Sangoro, Charge transport and dipolar relaxations in an alkali metal oligoether carboxylate ionic liquid. *Colloid Polym.*  
248 *Sci.* **292**, 1933–1938 (2014).
- 249 15. JC Dyre, The random free-energy barrier model for ac conduction in disordered solids. *J. Appl. Phys.* **64**, 2456–2468  
250 (1988).
- 251 16. JR Sangoro, et al., Diffusion in ionic liquids: The interplay between molecular structure and dynamics. *Soft Matter* **7**,  
252 1678–1681 (2011).
- 253 17. T Cosby, Z Vicars, EU Mapesa, K Tsunashima, J Sangoro, Charge transport and dipolar relaxations in phosphonium-based  
254 ionic liquids. *J. Chem. Phys.* **147** (2017).
- 255 18. H Scher, M Lax, Stochastic transport in a disordered solid. i. theory. *Phys. Rev. B* **7**, 4491–4502 (1973).
- 256 19. TB Schröder, JC Dyre, ac hopping conduction at extreme disorder takes place on the percolating cluster. *Phys. Rev. Lett.*  
257 **101**, 025901 (2008).
- 258 20. TB Schröder, JC Dyre, Scaling and universality of ac conduction in disordered solids. *Phys. Rev. Lett.* **84**, 310–313 (2000).
- 259 21. JR Sangoro, F Kremer, Charge transport and glassy dynamics in ionic liquids. *Accounts Chem. Res.* **45**, 525–532 (2012)  
260 PMID: 22082024.
- 261 22. PJ Griffin, et al., Ion transport and structural dynamics in homologous ammonium and phosphonium-based room  
262 temperature ionic liquids. *J. Chem. Phys.* **142** (2015).
- 263 23. T Cosby, Z Vicars, Y Wang, J Sangoro, Dynamic-Mechanical and Dielectric Evidence of Long-Lived Mesoscale Organization  
264 in Ionic Liquids. *J. Phys. Chem. Lett.* **8**, 3544–3548 (2017).
- 265 24. T Cosby, Z Vicars, M Heres, K Tsunashima, J Sangoro, Dynamic and structural evidence of mesoscopic aggregation in  
266 phosphonium ionic liquids. *J. Chem. Phys.* **148** (2018).
- 267 25. T Cosby, U Kapoor, JK Shah, J Sangoro, Mesoscale organization and dynamics in binary ionic liquid mixtures. *The J.*  
268 *Phys. Chem. Lett.* **10**, 6274–6280 (2019) PMID: 31560210.
- 269 26. F Nemoto, et al., Neutron scattering studies on short- and long-range layer structures and related dynamics in imidazolium-  
270 based ionic liquids. *J. Chem. Phys.* **149** (2018).
- 271 27. R Hayes, GG Warr, R Atkin, Structure and Nanostructure in Ionic Liquids. *Chem. Rev.* **115**, 6357–6426 (2015).
- 272 28. A Triolo, et al., Thermodynamics, structure, and dynamics in room temperature ionic liquids: The case of 1-Butyl-3-methyl  
273 imidazolium hexafluorophosphate ([bmim][PF 6]). *J. Phys. Chem. B* **110**, 21357–21364 (2006).
- 274 29. A Triolo, O Russina, HJ Bleif, E Di Cola, Nanoscale segregation in room temperature ionic liquids. *J. Phys. Chem. B*  
275 **111**, 4641–4644 (2007).
- 276 30. RP Daly, JC Araque, CJ Margulis, Communication: Stiff and soft nano-environments and the "octopus Effect "are the  
277 crux of ionic liquid structural and dynamical heterogeneity. *J. Chem. Phys.* **147** (2017).
- 278 31. TL Greaves, et al., Fluorous protic ionic liquids exhibit discrete segregated nano-scale solvent domains and form new  
279 populations of nano-scale objects upon primary alcohol addition. *Phys. Chem. Chem. Phys.* **15**, 7592–7598 (2013).
- 280 32. F Lo Celso, A Triolo, L Gontrani, O Russina, Communication: Anion-specific response of mesoscopic organization in ionic  
281 liquids upon pressurization. *J. Chem. Phys.* **148**, 1–5 (2018).
- 282 33. JJ Hettige, JC Araque, CJ Margulis, Bicontinuity and multiple length scale ordering in triphasic hydrogen-bonding ionic  
283 liquids. *J. Phys. Chem. B* **118**, 12706–12716 (2014).
- 284 34. L Gontrani, et al., Liquid structure of trihexyltetradecylphosphonium chloride at ambient temperature: An x-ray scattering

- 285 and simulation study. *J. Phys. Chem. B* **113**, 9235–9240 (2009).
- 286 35. Y Ji, R Shi, Y Wang, G Saielli, Effect of the chain length on the structure of ionic liquids: From spatial heterogeneity to  
287 ionic liquid crystals. *J. Phys. Chem. B* **117**, 1104–1109 (2013).
- 288 36. JJ Hettige, HK Kashyap, CJ Margulis, Communication: Anomalous temperature dependence of the intermediate range  
289 order in phosphonium ionic liquids. *J. Chem. Phys.* **140**, 1–5 (2014).
- 290 37. T Pott, P Méléard, New insight into the nanostructure of ionic liquids: A small angle X-ray scattering (SAXS) study on  
291 liquid tri-alkyl-methyl-ammonium bis(trifluoromethanesulfonyl)amides and their mixtures. *Phys. Chem. Chem. Phys.* **11**,  
292 5469–5475 (2009).
- 293 38. JJ Hettige, JC Araque, HK Kashyap, CJ Margulis, Communication: Nanoscale structure of tetradecyltriethylphosphonium  
294 based ionic liquids. *J. Chem. Phys.* **144** (2016).
- 295 39. HK Kashyap, et al., Temperature-dependent structure of ionic liquids: X-ray scattering and simulations. *Faraday Discuss.*  
296 **154**, 133–143 (2012).
- 297 40. K Shimizu, MF Costa Gomes, AA Pádua, LP Rebelo, JN Canongia Lopes, Three commentaries on the nano-segregated  
298 structure of ionic liquids. *J. Mol. Struct. THEOCHEM* **946**, 70–76 (2010).
- 299 41. EI Izgorodina, M Forsyth, DR MacFarlane, On the components of the dielectric constants of ionic liquids: Ionic polarization?  
300 *Phys. Chem. Chem. Phys.* **11**, 2452–2458 (2009).
- 301 42. SSN Murthy, Liquid–liquid transition in polymers and glass-forming liquids. *J. Polym. Sci. Part B: Polym. Phys.* **31**,  
302 475–480 (1993).
- 303 43. I Kaori, M CT, C Angell, Thermodynamic determination of fragility in liquids and a fragile-to-strong liquid transition in  
304 water. *Nature* **398** (1999).
- 305 44. KI Murata, H Tanaka, Liquid-liquid transition without macroscopic phase separation in a water-glycerol mixture. *Nat.*  
306 *Mater.* **11**, 436–443 (2012).
- 307 45. Z Wang, et al., Liquid-liquid phase transition and its phase diagram in deeply-cooled heavy water confined in a nanoporous  
308 silica matrix. *J. Phys. Chem. Lett.* **6**, 2009–2014 (2015).
- 309 46. G Adam, JH Gibbs, On the temperature dependence of cooperative relaxation properties in glass-forming liquids. *The J.*  
310 *Chem. Phys.* **43**, 139–146 (1965).
- 311 47. R Richert, CA Angell, Dynamics of glass-forming liquids. V. On the link between molecular dynamics and configurational  
312 entropy. *The J. Chem. Phys.* **108**, 9016–9026 (1998).
- 313 48. MD Ediger, P Harrowell, Perspective: Supercooled liquids and glasses. *J. Chem. Phys.* **137** (2012).
- 314 49. L Berthier, M Ozawa, C Scalliet, Configurational entropy of glass-forming liquids. *J. Chem. Phys.* **150** (2019).
- 315 50. C Iacob, et al., Charge transport and glassy dynamics in imidazole-based liquids. *J. Chem. Phys.* **129** (2008).
